# Supplementary material for: The Divergent Effect of Competition on Platforms: Deterring Recruits, Motivating Converts
Source: Atypon-hosted journal article supplement (doi:10.1287/stsc.2022.0125), 2024-06-18
Supplement: stsc.2022.0125.sm1.pdf [file stsc.2022.0125.sm1.pdf]

## APPENDIX A: Additional Details on Robustness Checks

### *Alternate specifications*

In addition to our main regressions, the entry model, and the graphical analysis, we evaluate the robustness of our specification to alternate modeling assumptions in Appendix Table B10. In the first model, we use a Poisson quasi-maximum likelihood specification for the count dependent variable—the number of contributions. Second, we estimate our regressions with region-specific time trends. Specifically, we classify countries depending on the World Bank Income Classification (high income or low/middle income) and then include separate quarterly time-trends for each of these two income categories. This specification allows us to control for the possibility that OpenStreetMap is evolving differently in richer and poorer countries. Finally, we implement a “placebo” regression to identify whether our results are driven purely by the structure of our setup or data rather than by the specific timing of Google Maps entry. In the spirit of Bertrand et al. (2004), we randomly assign each country to one of the five quarters in which Google Maps entered and use this entry time to estimate a new *Post Google Entry*<sub>it</sub> variable that we use in the regression testing the baseline specification.<sup>1</sup> For example, if a country experiences a Google Maps entry in the first quarter of 2009 (the first wave), we might randomly assign it to the fourth quarter of 2010 (the fifth wave), assign a country from the fifth wave to the second wave, and so on.

The results from the three tests for the pre-entry and newly-recruited contributions variables are presented in Appendix Table B10; the results are not sensitive to these alternate specifications. In particular, as Columns 3 and 6 show, the estimates from our baseline regression are not significantly different from zero, suggesting that our results are not driven by mechanical artifacts of our setup or by the definitions of variables, but are indeed driven by the specific timing of Google Maps entry. Further, our results for newly-recruited contributions are based on the number of contributors making their first contribution in a given quarter. This definition of a newly-recruited contributor is admittedly arbitrary and so, in Appendix Table

---

<sup>1</sup> We do not implement many permutations of the placebo inference, just one of the many possible combinations using a randomly chosen seed.

B9, we examine alternate definitions of newly-recruited-entry contributors (those who have been active in the previous two quarters or the previous six quarters) and find the negative effect on contributions robust. In other words, it does not matter if we measure newly-recruited contributors as those making their first contribution in a given quarter or those who are “relatively new” (having contributed in the last few quarters for the first time); the effect of competition on contributions from this group is still negative. Combined with the event study figures, these results are especially helpful in building confidence in the result that pre-entry and newly-recruited contributors have a differential response to competition.

### ***DID Decomposition***

In staggered Difference-in-Difference, the general estimator from the TWFE approach is actually a “weighted average of all possible two-group/two-period DiD estimators in the data.” When the treatment effect varies across time, some of these 2x2 estimates enter the average with negative weights because already-treated units act as controls: more weights will be given to units treated towards the middle of the panel, so if the treatment effects during that period differ materially from other treatment effects, the coefficient could be biased (Goodman-Bacon 2021).

Appendix Figure B7 shows results based on DiD decomposition theorem from Goodman-Bacon (2021) for the total number of contributions. The plot shows each 2x2 DiD with its weight and calculates the average effect (shown by the red line). The weights are determined by the absolute size of the subsample, the relative size of the treatment and control groups in the subsample, and the timing of the treatment in the subsample (variance). We can see that the groups treated earlier in the period (light cross) and the groups treated later in the period (dark cross) distribute evenly and the majority of the TWFE estimates are negative. The few positive coefficients are lightly-weighted as the relative sample size is very small and the treatment is toward the beginning or ending of the sampling period.

## List of Appendix Figures

- B.1 Overview of Making a Contribution on OpenStreetMap . . . . .
- B.2 Google Map Launched Globally with a “Blank Map” . . . . .
- B.3 Average Number of Changes Made Each Edit . . . . .
- B.4 Distribution of the Number of Pre-Entry Contributors . . . . .
- B.5 Size of Pre-entry Sample . . . . .
- B.6 Compare Countries by Wave . . . . .
- B.7 DID Estimate Decomposition . . . . .

## List of Appendix Tables

|      |                                                                                                                 |
|------|-----------------------------------------------------------------------------------------------------------------|
| B.1  | Examples of Competition between Traditional and Crowdsourced Knowledge Platforms . . . . .                      |
| B.2  | Summary Statistics (Contributor-Quarter Level) . . . . .                                                        |
| B.3  | Entry Model . . . . .                                                                                           |
| B.4  | Impact of Competition on Contributions Interacted with Google Popularity . . . . .                              |
| B.5  | Robustness Check: Comparing Pre-trends between Treatment and Control Communities in Log-Linear Models . . . . . |
| B.6  | Heterogenous Effect of Competition on Pre-Entry Contributors without Control Community Size . . . . .           |
| B.7  | Impact of Competition of Contributions Controlling for Community Size . . . . .                                 |
| B.8  | Impact of Competition on Contributions Interacted with Community Size . . . . .                                 |
| B.9  | Alternate Definitions of Newly-Recruited Contributions . . . . .                                                |
| B.10 | Evaluating Robustness to Alternate Specifications . . . . .                                                     |
| B.11 | Impact of Competition of Contributions Removing Outliers . . . . .                                              |
| B.12 | The Impact of Competition on the number of Pre-Entry Contributors . . . . .                                     |
| B.13 | CEM and Time-Varying Trends . . . . .                                                                           |
| B.14 | Testing Ideology Using 512 Matched Users . . . . .                                                              |
| B.15 | Impact of Competition of Contributions Dropping the 5 <sup>th</sup> Wave . . . . .                              |
| B.16 | Country-level Heterogeneous Impact of Competition on Contributions . . . . .                                    |
| B.17 | Impact of Competition on Contributions Dropping Multi-country Contributors . . . . .                            |

FIGURE B.1. Overview of Making a Contribution on OpenStreetMap

(i) Locate

(ii) Portray

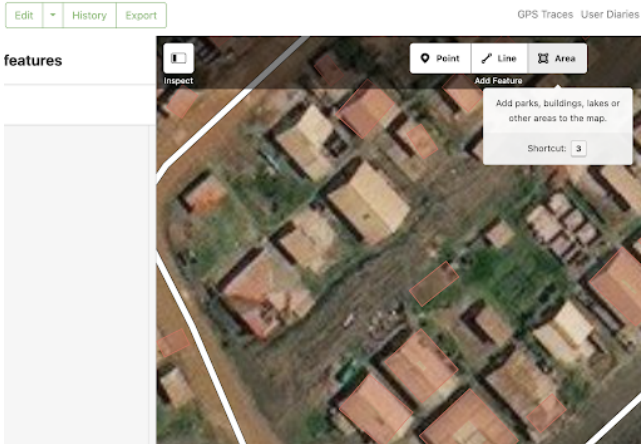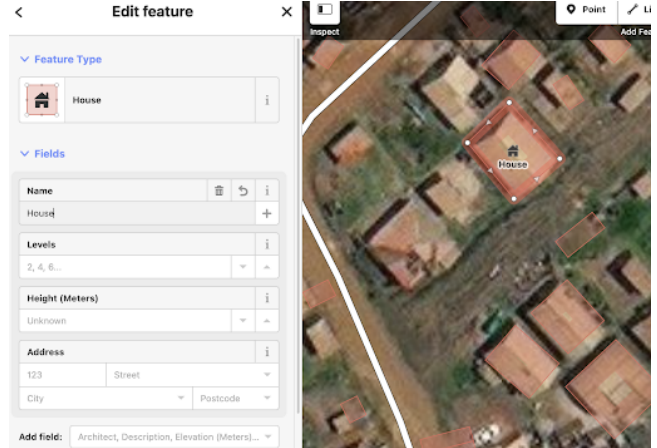

(iii) Describe

(iv) Save

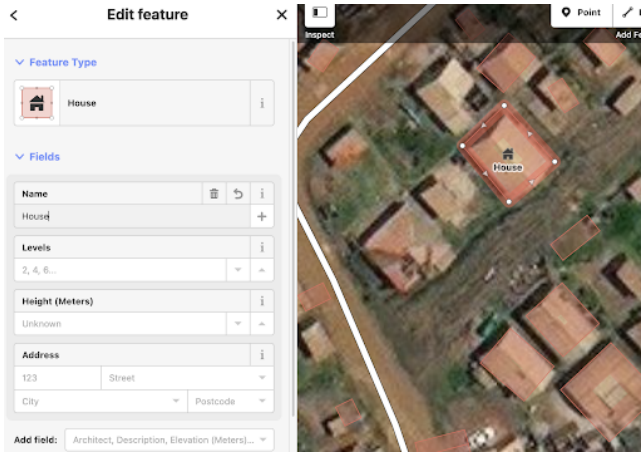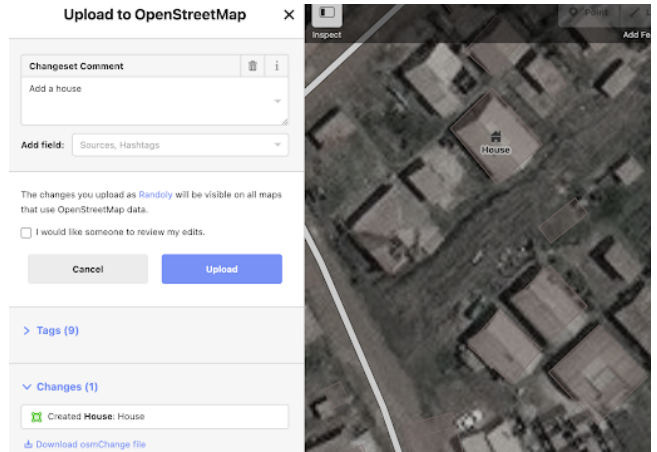

Note: This graph shows the steps for a member to make a contribution (adding a building) on OpenStreetMap.

FIGURE B.2. Google Map Launched Globally with a “Blank Map”

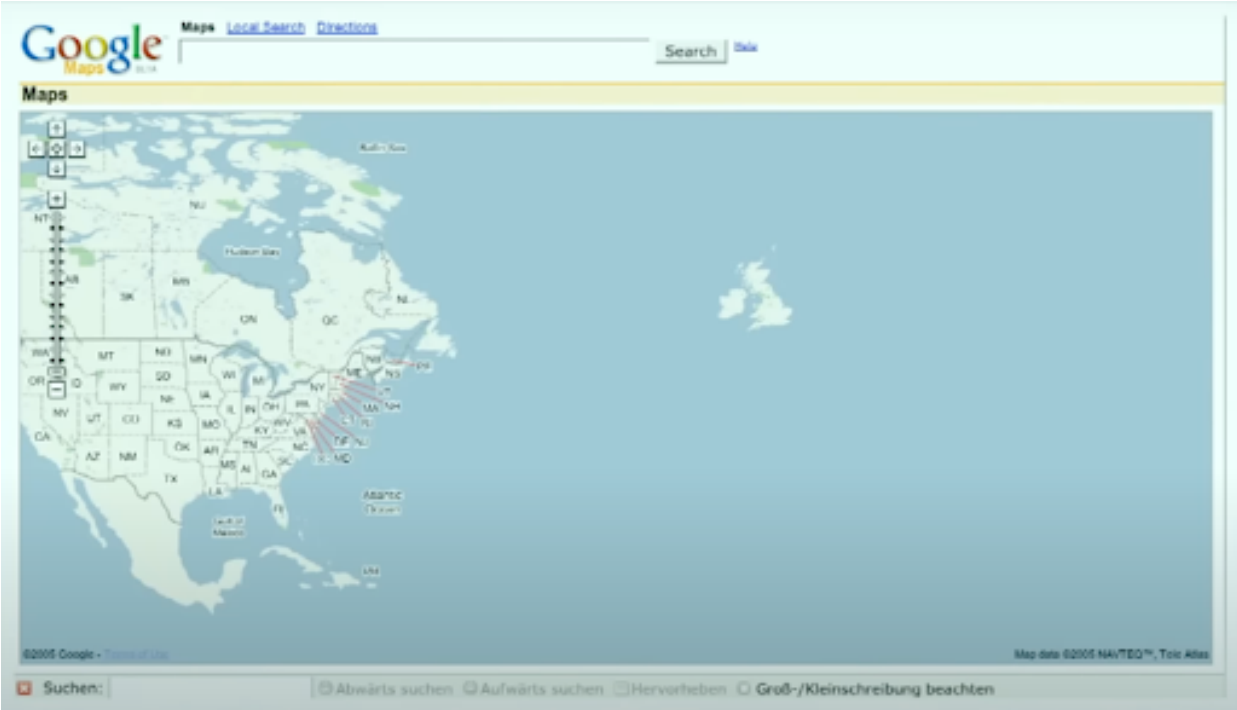

Note: This graph shows how Google Map launched globally with a “blank map”.

FIGURE B.3. Average Number of Changes Made Each Edit

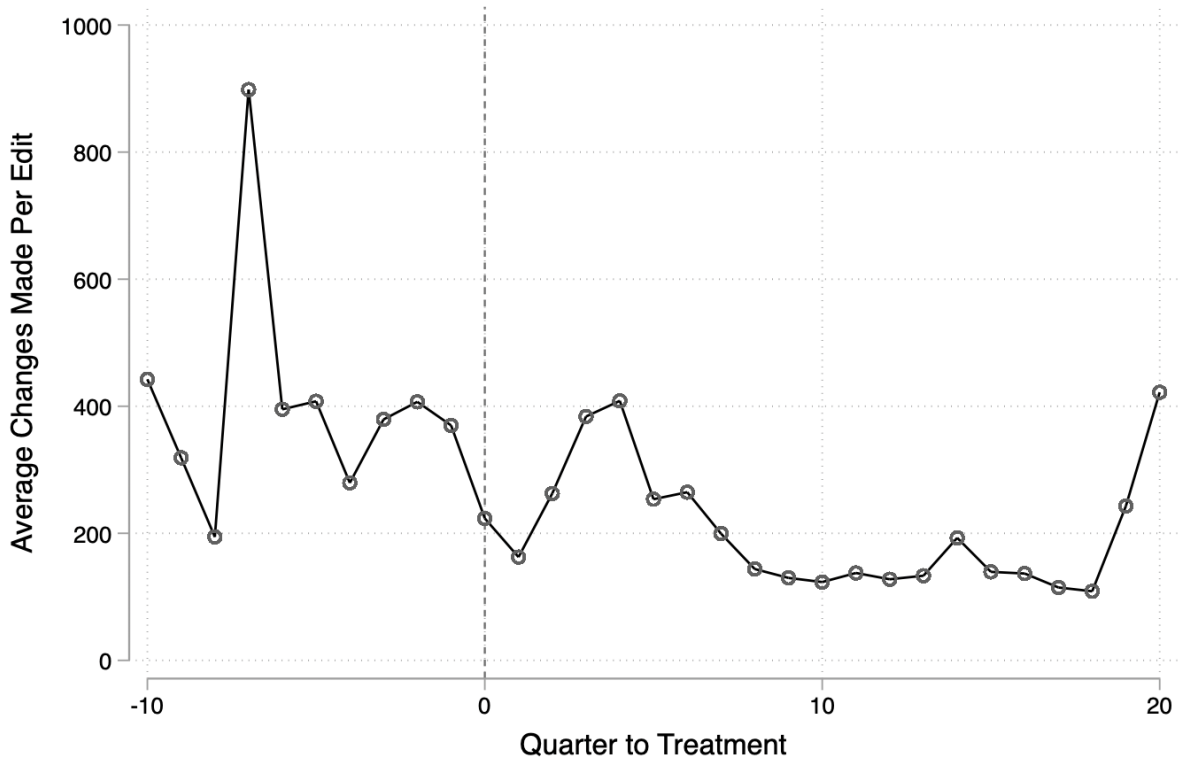

Note: This graph shows the trend in the average number of changes made in each edit over time.

FIGURE B.4. Distribution of the Number of Pre-Entry Contributors

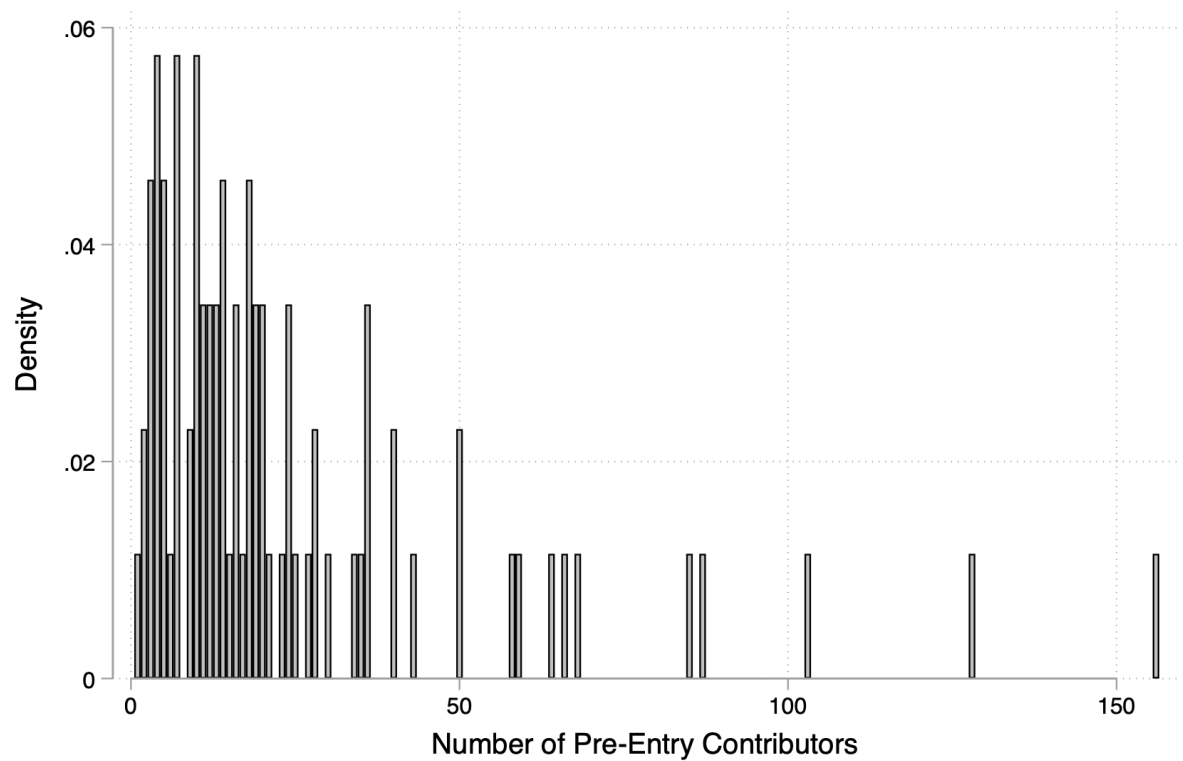

Note: This graph shows the distribution of the number of pre-entry contributors by country.

FIGURE B.5. Size of Pre-entry Sample

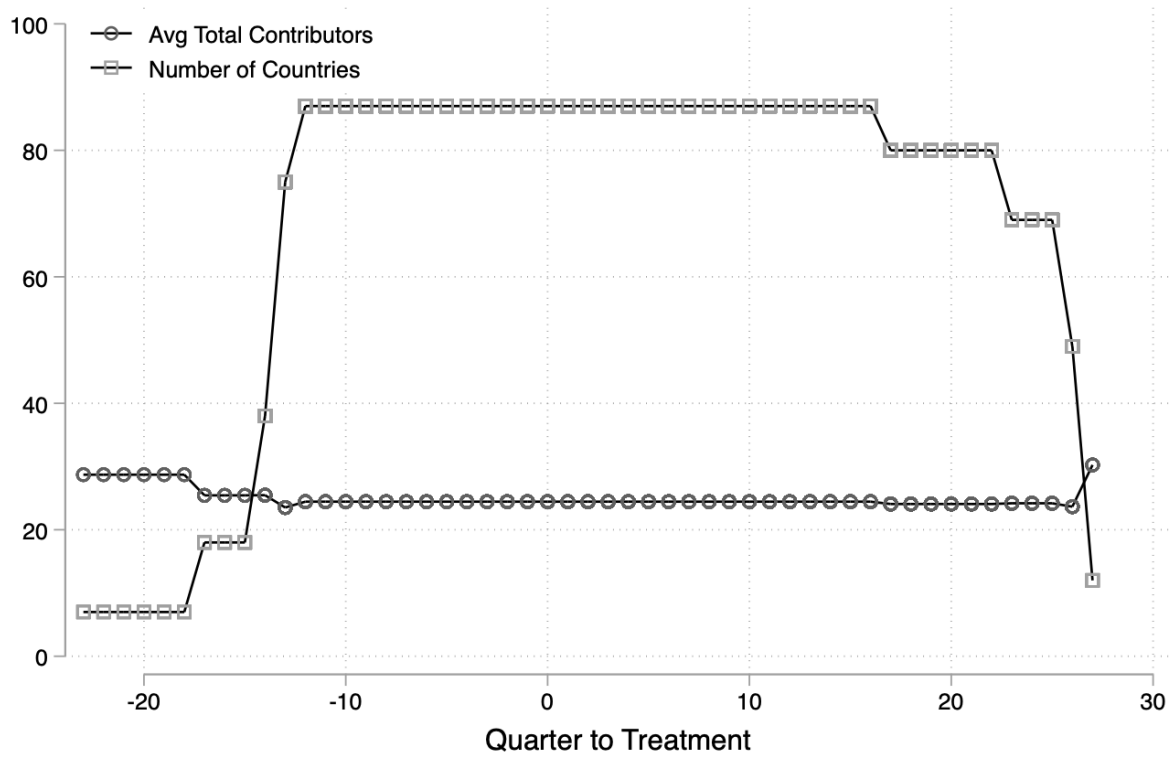

*Note:* This graph shows the number of countries and the average number of total contributors in the pre-entry sample.

FIGURE B.6. Compare Countries by Wave

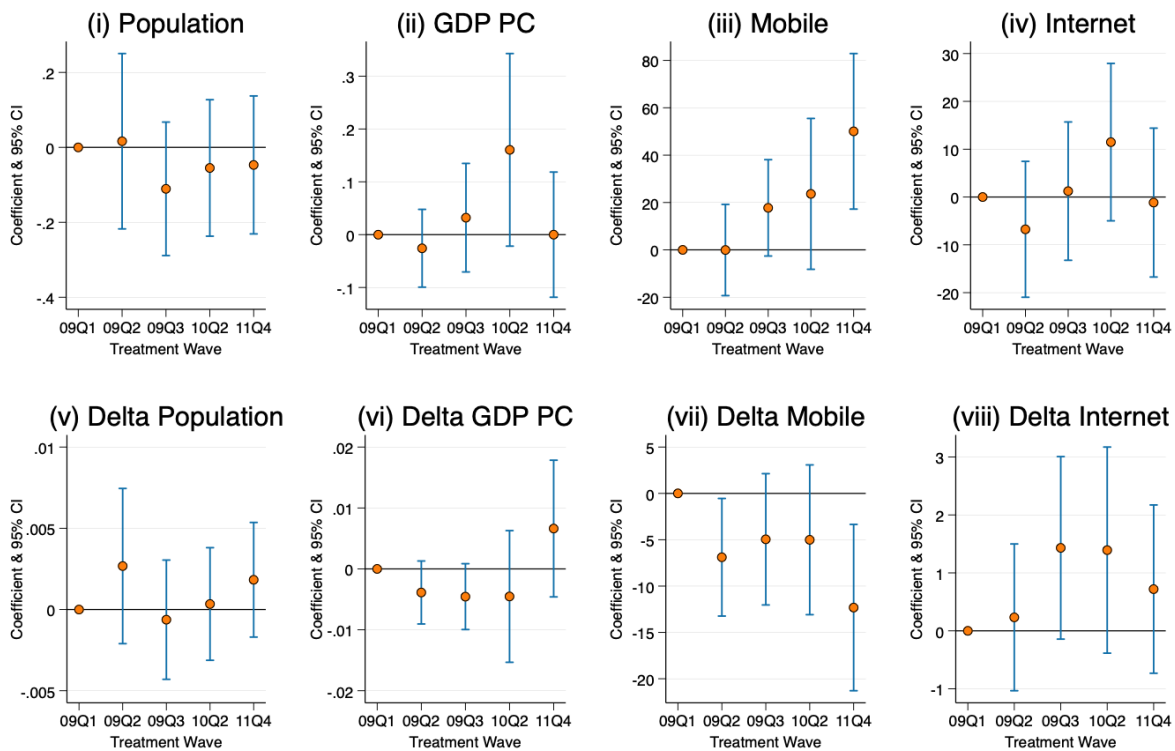

*Note:* This figure compares all the countries depending on the year in which they were treated. Each panel presents coefficients on the years of treatment from cross-sectional regressions of different country-level covariates. The dependent variables in the first row are (i) population, (ii) GDP per capita, (iii) mobile penetration and (iv) internet penetration. Variables in the second row provide a measure of pre-treatment trends, which are (v) change in population, (vi) change in GDP per capita, (vii) change in mobile penetration, and (viii) change in internet penetration. We plot coefficients for each year of digitization, including 95% confidence intervals. The omitted category is the group of countries that were first treated (2009 Q1).

FIGURE B.7. DID Estimate Decomposition

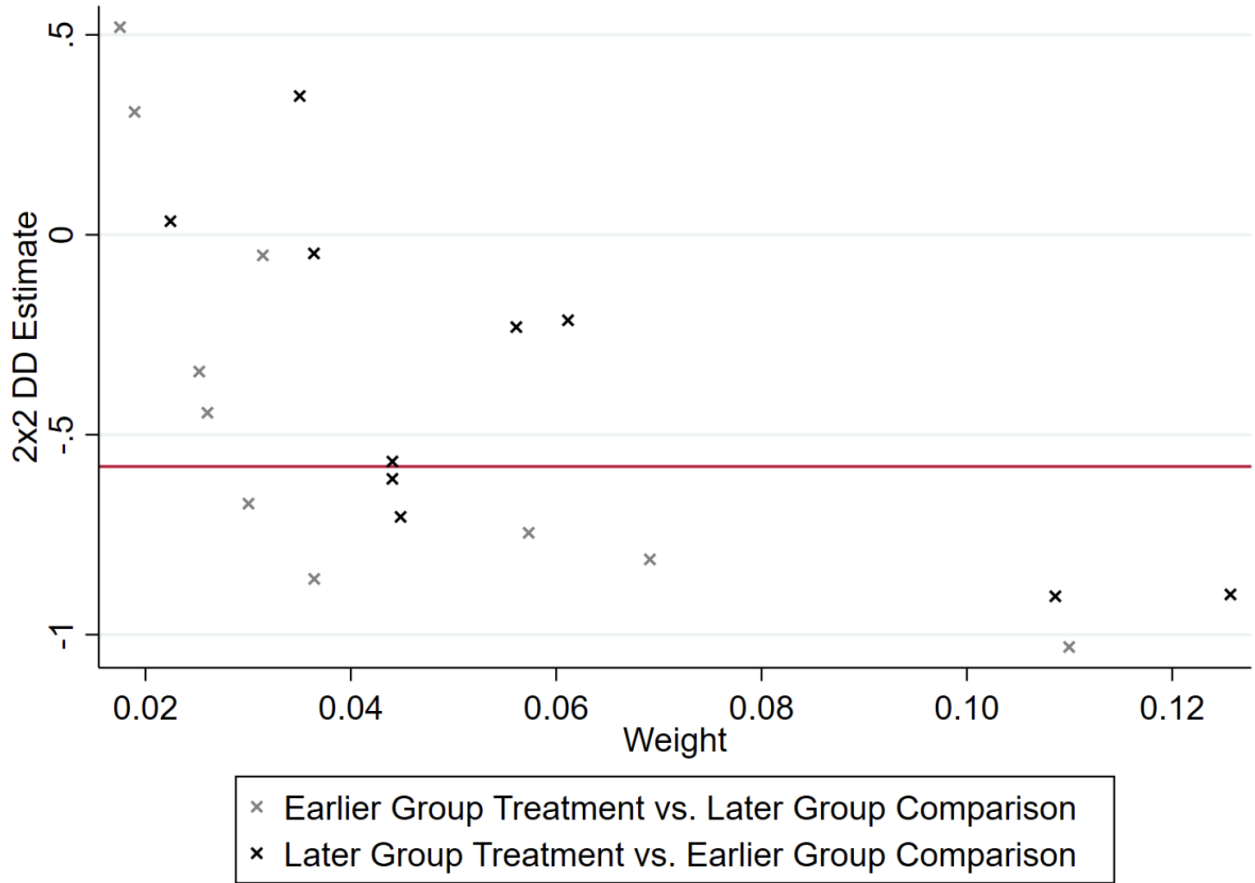

Note: This figure provides the decomposition of DID estimates for the total number of contributions based on Goldman-Bacon (2021). See text for more details.

Table B.1. Examples of Competition between Traditional and Crowdsourced Knowledge Platforms

| <b>Category</b>                                                                                                        | <b>Traditional</b><br>Professionally sourced, closed                                                          | <b>Crowdsourced</b><br>Volunteer, Open                                         |
|------------------------------------------------------------------------------------------------------------------------|---------------------------------------------------------------------------------------------------------------|--------------------------------------------------------------------------------|
| <i>Reference guides</i><br>Online Maps<br>Encyclopedic Reference<br>Coding Guides                                      | Google Maps<br>Encyclopaedia Britannica<br>O'Reilly                                                           | OpenStreetMap<br>Wikipedia<br>Stackoverflow                                    |
| <i>Reviews/Evaluations</i><br>Restaurant Reviews<br>Product Reviews<br>Book Reviews<br>Theater/Arts<br>Startups        | Guide Michelin<br>Consumer Reports<br>NY Times<br>National Endowment for Arts<br>TechCrunch, Venture Capital  | Yelp<br>Amazon Reviews<br>Goodreads<br>Kickstarter<br>Angellist                |
| <i>Software</i><br>Mapping Software<br>Image Editing Software<br>Relational Databases<br>Desktop Publishing            | ESRI Arc GIS<br>Adobe Photoshop<br>Oracle9i<br>Microsoft Word                                                 | QGIS<br>GNU Image Manipulation Pro<br>MySQL<br>OpenOffice                      |
| <i>Media &amp; Publishing</i><br>News<br>Financial Analysis<br>Classifieds<br>Stock Photography<br>Video Entertainment | Newspapers<br>CNBC, Wall Street Journal<br>Newspapers<br>Getty (pre 2005), Corbis<br>Netflix / Traditional TV | Blogs<br>Reddit WallStreetBets<br>Craigslist<br>Flickr, iStockPhoto<br>YouTube |

Note: This table illustrates a few examples where traditional and crowdsourced platforms compete with each other in different categories. These examples are only illustrative of the diversity in the type of competition we study and are not a comprehensive list of all such types of competition, or even of all the relevant platforms in any given category.

Table B.2. Summary Statistics (Contributor-Quarter Level)

|                                   | N     | Mean   | SD   | Median   | Min  | Max  |
|-----------------------------------|-------|--------|------|----------|------|------|
| <i>Outcomes</i>                   |       |        |      |          |      |      |
| Overall Contributions             | 85080 | 0.4    | 14.5 | 0        | 0    | 2649 |
| Total Active Members              | 85080 | 0.1    | 0.2  | 0        | 0    | 1    |
| <i>Timing Variables</i>           |       |        |      |          |      |      |
| Post                              | 85080 | 0.6    | 0.5  | 1        | 0    | 1    |
| Year                              | 85080 | 2010.5 | 2.9  | 2010.5   | 2006 | 2015 |
| <i>Controls</i>                   |       |        |      |          |      |      |
| Population (100 millions)         | 85016 | 0.4    | 0.4  | .207206  | 0    | 2    |
| GDP per capita, PPP (in 100k USD) | 80800 | 0.1    | 0.1  | .0720666 | 0    | 1    |
| Mobile Penetration (per 100)      | 85012 | 76.6   | 41.5 | 76.67284 | 0    | 232  |
| Internet Penetration (per 100)    | 84808 | 22.6   | 22.1 | 14.33    | 0    | 98   |

*Note:* Observations at the user-quarter level. Data on controls is at the country-year level. GDP per capita is PPP adjusted.

Table B.3. Entry Model  
Panel A. Cross-Sectional

|                          | (1)<br>Entry Quarter | (2)<br>Entry Quarter | (3)<br>Entry Quarter |
|--------------------------|----------------------|----------------------|----------------------|
| Population (millions)    |                      | -0.54<br>(0.79)      | -1.16<br>(0.96)      |
| GDP per capita           |                      | 1.54<br>(2.69)       | 2.17<br>(2.66)       |
| Mobile Penetration       | 0.028<br>(0.019)     | 0.024<br>(0.019)     | 0.016<br>(0.019)     |
| Internet Penetration     | -0.045<br>(0.030)    | -0.056*<br>(0.031)   | -0.048<br>(0.032)    |
| User Contribution Growth |                      |                      | 0.019<br>(0.014)     |
| N                        | 81                   | 76                   | 76                   |
| R2                       | 0.21                 | 0.21                 | 0.24                 |

Standard errors in parentheses

\*  $p < 0.10$ , \*\*  $p < 0.05$ , \*\*\*  $p < 0.01$

Panel B. Discrete Time Hazard Model

|                                | (1)<br>Entry Quarter   | (2)<br>Entry Quarter  | (3)<br>Entry Quarter   | (4)<br>Entry Quarter    | (5)<br>Entry Quarter     |
|--------------------------------|------------------------|-----------------------|------------------------|-------------------------|--------------------------|
| Population (millions)          |                        | 0.10<br>(0.087)       | 0.10<br>(0.086)        | 0.10<br>(0.089)         | 0.10<br>(0.088)          |
| GDP per capita                 |                        | -0.31<br>(0.28)       | -0.30<br>(0.26)        | -0.30<br>(0.29)         | -0.31<br>(0.29)          |
| Mobile Penetration             | -0.0023**<br>(0.00093) | -0.0024**<br>(0.0011) | -0.0023**<br>(0.0011)  | -0.0024**<br>(0.0011)   | -0.0024**<br>(0.0011)    |
| Internet Penetration           | 0.000070<br>(0.0033)   | 0.0027<br>(0.0038)    | 0.0027<br>(0.0038)     | 0.0026<br>(0.0039)      | 0.0026<br>(0.0039)       |
| Change Ratio (last quarter)    |                        |                       | 0.000015<br>(0.000032) |                         |                          |
| Change Ratio (last 2 quarters) |                        |                       |                        | -0.000022<br>(0.000044) |                          |
| Change Ratio (last 3 quarters) |                        |                       |                        |                         | -0.0000092<br>(0.000037) |
| N                              | 218                    | 204                   | 204                    | 204                     | 204                      |
| Quarter FE                     | Yes                    | Yes                   | Yes                    | Yes                     | Yes                      |

\* $p < 0.10$ ; \*\* $p < 0.05$ ; \*\*\* $p < 0.01$

Reported coefficients represent marginal effects with quarter fixed effects. Standard errors clustered at the country level.

*Note:* This table provides estimates of a model predicting the timing of Google Maps entry based on country and openstreet-map characteristics. The key dependent variable is the quarter in which Google Maps enters. Panel A uses a cross-sectional panel of countries, while Panel B presents results from a discrete time probit model.

Table B.4. Impact of Competition on Contributions Interacted with Google Popularity

|                                | (1)<br>Pre-Entry Contributions | (2)<br>Newly Recruited Contributions |
|--------------------------------|--------------------------------|--------------------------------------|
| Post Google Entry              | 0.021**<br>(0.0096)            | -0.48***<br>(0.17)                   |
| Post Google × High Competition | -0.0020<br>(0.0096)            | -0.13<br>(0.14)                      |
| Population (millions)          | 0.081<br>(0.076)               | 4.00**<br>(1.77)                     |
| GDP per capita                 | -0.13<br>(0.089)               | 0.44<br>(2.61)                       |
| Mobile Penetration             | 0.00022<br>(0.00016)           | 0.0063**<br>(0.0028)                 |
| Internet Penetration           | -0.000035<br>(0.00030)         | -0.0037<br>(0.0081)                  |
| Community Member FE            | Yes                            | Yes                                  |
| Quarter FE                     | Yes                            | Yes                                  |
| N                              | 80524                          | 3192                                 |
| Adj. R2                        | 0.056                          | 0.78                                 |

Standard errors in parentheses

\*  $p < 0.10$ , \*\*  $p < 0.05$ , \*\*\*  $p < 0.01$

*Note:* Estimates the impact of competition from Google Maps on the number of pre-entry and newly-recruited contributions in a differences-in-differences framework and interacts the Post dummy with an indicator of whether the country is of high competition.

Table B.5. Robustness Check: Comparing Pre-trends between Treatment and Control Communities in Log-Linear Models

|                       | Pre-Entry          |                        | Newly-Recruited    |                      |
|-----------------------|--------------------|------------------------|--------------------|----------------------|
|                       | (1)                | (2)                    | (3)                | (4)                  |
| Google-Entry(-6)      | 0.012<br>(0.021)   | 0.0094<br>(0.021)      | 0.72***<br>(0.23)  | 0.63***<br>(0.23)    |
| Google-Entry(-5)      | -0.0072<br>(0.020) | -0.0085<br>(0.020)     | 0.54**<br>(0.23)   | 0.49**<br>(0.23)     |
| Google-Entry(-4)      | -0.0067<br>(0.018) | -0.0078<br>(0.019)     | 0.49**<br>(0.19)   | 0.45**<br>(0.19)     |
| Google-Entry(-3)      | -0.031<br>(0.020)  | -0.032<br>(0.020)      | 0.17<br>(0.19)     | 0.14<br>(0.19)       |
| Google-Entry(-2)      | -0.0067<br>(0.018) | -0.0073<br>(0.018)     | 0.24<br>(0.20)     | 0.22<br>(0.20)       |
| Google-Entry(-1)      | 0.010<br>(0.011)   | 0.010<br>(0.011)       | 0.42**<br>(0.17)   | 0.41**<br>(0.17)     |
| Google-Entry(1)       | 0.014<br>(0.014)   | 0.014<br>(0.014)       | -0.10<br>(0.15)    | -0.090<br>(0.15)     |
| Google-Entry(2)       | 0.027*<br>(0.015)  | 0.028*<br>(0.015)      | -0.41**<br>(0.17)  | -0.38**<br>(0.18)    |
| Google-Entry(3)       | 0.0078<br>(0.016)  | 0.0087<br>(0.016)      | -0.54***<br>(0.17) | -0.51***<br>(0.17)   |
| Google-Entry(4)       | 0.0089<br>(0.012)  | 0.010<br>(0.012)       | -0.52***<br>(0.20) | -0.49**<br>(0.20)    |
| Google-Entry(5)       | 0.013<br>(0.013)   | 0.014<br>(0.013)       | -0.50**<br>(0.22)  | -0.45*<br>(0.23)     |
| Google-Entry(6)       | 0.016<br>(0.014)   | 0.017<br>(0.014)       | -0.52**<br>(0.26)  | -0.46*<br>(0.26)     |
| Google-Entry(7)       | 0.0057<br>(0.015)  | 0.0070<br>(0.015)      | -0.70***<br>(0.26) | -0.65**<br>(0.27)    |
| Google-Entry(8)       | 0.012<br>(0.014)   | 0.013<br>(0.014)       | -0.62**<br>(0.28)  | -0.57**<br>(0.28)    |
| Google-Entry(9)       | 0.015<br>(0.014)   | 0.017<br>(0.014)       | -0.76**<br>(0.30)  | -0.69**<br>(0.31)    |
| Google-Entry(10)      | 0.012<br>(0.013)   | 0.013<br>(0.013)       | -0.83**<br>(0.35)  | -0.77**<br>(0.35)    |
| Population (millions) | 0.068<br>(0.076)   | 0.078<br>(0.074)       | 3.90**<br>(1.84)   | 4.07**<br>(1.78)     |
| GDP per capita        | -0.080<br>(0.064)  | -0.11<br>(0.091)       | -0.24<br>(2.02)    | 0.21<br>(2.46)       |
| Mobile Penetration    |                    | 0.00021<br>(0.00015)   |                    | 0.0061**<br>(0.0029) |
| Internet Penetration  |                    | -0.000041<br>(0.00031) |                    | -0.0047<br>(0.0081)  |
| Country FE            | Yes                | Yes                    | Yes                | Yes                  |
| Quarter FE            | Yes                | Yes                    | Yes                | Yes                  |
| N                     | 80800              | 80524                  | 3224               | 3192                 |
| Log-likelihood        | -18773.1           | -18825.5               | -4535.8            | -4482.8              |

Standard errors in parentheses

\*  $p < 0.10$ , \*\*  $p < 0.05$ , \*\*\*  $p < 0.01$ 

*Note:* This table provides estimates from Figure 2 Panel A and B. Columns 1 and 2 use the time-varying, log-linear specification  $\ln(Y_{it} + 1) = \alpha + \sum_z \beta_z \times 1(z) + \gamma_i + \delta_t + \varepsilon_{it}$  where  $\gamma_i$  and  $\delta_t$  represent contributor and time fixed effects respectively for contributor  $i$  in quarter  $t$ . Columns 3 and 4 use an analogous specification defined for country  $c$  in quarter  $t$ .  $z$  represents the “lag”, or the quarters relative to a “zero quarter”, which marks the quarter when a country first faced competition from Google Maps except for  $z > 10$  and  $z < -6$  where  $z$  equals 10 and -6 respectively.

Table B.6. Heterogenous Effect of Competition on Pre-Entry Contributors without Control Community Size

|                      | Ideology           |                      | Social            |                   | Standing            |                      | All                |
|----------------------|--------------------|----------------------|-------------------|-------------------|---------------------|----------------------|--------------------|
|                      | (1)<br>Github      | (2)<br>Firefox Share | (3)<br>Maillist   | (4)<br>Events     | (5)<br>Rank         | (6)<br>Contribs      | (7)<br>—           |
| Post Google Entry    | 0.013<br>(0.0097)  | 0.0094<br>(0.010)    | 0.015<br>(0.0094) | 0.014<br>(0.0097) | 0.029***<br>(0.010) | 0.028***<br>(0.0092) | 0.021*<br>(0.011)  |
| Post X High-Ideology | 0.023**<br>(0.011) | 0.015*<br>(0.0080)   |                   |                   |                     |                      | 0.021**<br>(0.010) |
| Post X High-Social   |                    |                      | 0.016<br>(0.011)  | 0.016<br>(0.010)  |                     |                      | 0.0063<br>(0.011)  |
| Post X High-Standing |                    |                      |                   |                   | -0.039*<br>(0.022)  | -0.079**<br>(0.033)  | -0.039*<br>(0.023) |
| <i>N</i>             | 80524              | 80524                | 80524             | 80524             | 80524               | 80524                | 80524              |
| adj. $R^2$           | 0.056              | 0.056                | 0.056             | 0.056             | 0.057               | 0.057                | 0.057              |

Standard errors in parentheses

\*  $p < 0.10$ , \*\*  $p < 0.05$ , \*\*\*  $p < 0.01$ 

Note: We present estimates decomposing the positive effect of pre-entry users depending on different drivers of attachment for this group of contributors. In three different analyses, we evaluate the role of ideological environment, opportunities for social interaction and the standing of the contributor, along with a model that includes all three factors. For each analysis, we classify a contributor as belonging to a group that ranks highly on each dimension and provide a heterogenous response to the effect of competitive entry. High-Ideology equals one if the contributor belongs to a country with above-median github contributions or firefox market share, High-Social equals one if a contributor belongs to a community with a mailing-list or has hosted a mapping event and High-Standing equals one if a contributor ranks in the top 5 by contributions or has more than 10 contributions in her community. All models include interactions by community size as well as an additional control. Please see text for more details.

Table B.7. Impact of Competition of Contributions Controlling for Community Size  
(a) Pre-Entry Contributors

|                       | (1)<br>Contributions | (2)<br>Contributions | (3)<br>Contributions | (4)<br>Contributions |
|-----------------------|----------------------|----------------------|----------------------|----------------------|
| Post Google Entry     |                      | 0.018**<br>(0.0085)  | 0.018**<br>(0.0088)  | 0.019**<br>(0.0089)  |
| Population (millions) | 0.12<br>(0.075)      |                      | 0.11<br>(0.077)      | 0.12<br>(0.076)      |
| GDP per capita        | -0.11<br>(0.094)     |                      | -0.057<br>(0.069)    | -0.12<br>(0.095)     |
| Mobile Penetration    | 0.00012<br>(0.00015) |                      |                      | 0.00014<br>(0.00015) |
| Internet Penetration  | 0.00019<br>(0.00039) |                      |                      | 0.00018<br>(0.00040) |
| Lag Community Size    | 0.0039**<br>(0.0016) | 0.0039**<br>(0.0015) | 0.0039**<br>(0.0015) | 0.0039**<br>(0.0016) |
| Community Member FE   | Yes                  | Yes                  | Yes                  | Yes                  |
| Quarter FE            | Yes                  | Yes                  | Yes                  | Yes                  |
| N                     | 80448                | 84993                | 80718                | 80448                |
| Adj. R2               | 0.058                | 0.058                | 0.059                | 0.058                |

Standard errors in parentheses

\*  $p < 0.10$ , \*\*  $p < 0.05$ , \*\*\*  $p < 0.01$

(b) Newly Recruited Contributors

|                       | (1)<br>Contributions  | (2)<br>Contributions  | (3)<br>Contributions  | (4)<br>Contributions  |
|-----------------------|-----------------------|-----------------------|-----------------------|-----------------------|
| Post Google Entry     |                       | -0.58***<br>(0.14)    | -0.56***<br>(0.14)    | -0.52***<br>(0.15)    |
| Population (millions) | 1.76*<br>(1.03)       |                       | 1.59<br>(1.09)        | 1.71<br>(1.03)        |
| GDP per capita        | 0.016<br>(1.89)       |                       | -0.67<br>(1.56)       | 0.18<br>(1.86)        |
| Mobile Penetration    | 0.0064***<br>(0.0023) |                       |                       | 0.0059**<br>(0.0023)  |
| Internet Penetration  | -0.0086<br>(0.0070)   |                       |                       | -0.0085<br>(0.0069)   |
| Lag Community Size    | 0.0040***<br>(0.0011) | 0.0043***<br>(0.0012) | 0.0040***<br>(0.0011) | 0.0040***<br>(0.0011) |
| Country FE            | Yes                   | Yes                   | Yes                   | Yes                   |
| Quarter FE            | Yes                   | Yes                   | Yes                   | Yes                   |
| N                     | 3116                  | 3393                  | 3142                  | 3116                  |
| Adj. R2               | 0.78                  | 0.78                  | 0.78                  | 0.78                  |

Standard errors in parentheses

\*  $p < 0.10$ , \*\*  $p < 0.05$ , \*\*\*  $p < 0.01$

Note: This table replicates the baseline specification with an additional co-variate controlling for lagged community size.

Table B.8. Impact of Competition on Contributions Interacted with Community Size

(a) Pre-Entry Contributors

|                       | (1)<br>Contributions   | (2)<br>Contributions | (3)<br>Contributions | (4)<br>Contributions  |
|-----------------------|------------------------|----------------------|----------------------|-----------------------|
| Post Google Entry     |                        | 0.021**<br>(0.0096)  | 0.024**<br>(0.010)   | 0.024**<br>(0.0100)   |
| Post × Mid-Size       |                        | -0.0029<br>(0.0086)  | -0.0073<br>(0.0090)  | -0.0055<br>(0.0089)   |
| Post × High-Size      |                        | -0.0034<br>(0.012)   | -0.0084<br>(0.011)   | -0.0066<br>(0.011)    |
| Population (millions) | 0.079<br>(0.075)       |                      | 0.093<br>(0.071)     | 0.098<br>(0.068)      |
| GDP per capita        | -0.12<br>(0.090)       |                      | -0.074<br>(0.069)    | -0.12<br>(0.091)      |
| Mobile Penetration    | 0.00020<br>(0.00015)   |                      |                      | 0.00021<br>(0.00014)  |
| Internet Penetration  | -0.000045<br>(0.00031) |                      |                      | 0.000059<br>(0.00031) |
| Community Member FE   | Yes                    | Yes                  | Yes                  | Yes                   |
| Quarter FE            | Yes                    | Yes                  | Yes                  | Yes                   |
| N                     | 80524                  | 85080                | 80800                | 80524                 |
| Adj. R2               | 0.056                  | 0.056                | 0.056                | 0.056                 |

Standard errors in parentheses

\*  $p < 0.10$ , \*\*  $p < 0.05$ , \*\*\*  $p < 0.01$ 

(b) Newly Recruited Contributors

|                       | (1)<br>Contributions | (2)<br>Contributions | (3)<br>Contributions | (4)<br>Contributions |
|-----------------------|----------------------|----------------------|----------------------|----------------------|
| Post Google Entry     |                      | -0.89***<br>(0.17)   | -0.83***<br>(0.17)   | -0.77***<br>(0.18)   |
| Post × Mid-Size       |                      | 0.28***<br>(0.077)   | 0.24***<br>(0.080)   | 0.22***<br>(0.077)   |
| Post × High-Size      |                      | 0.48***<br>(0.11)    | 0.41***<br>(0.11)    | 0.41***<br>(0.11)    |
| Population (millions) | 4.23**<br>(1.80)     |                      | 3.01*<br>(1.72)      | 3.23*<br>(1.64)      |
| GDP per capita        | 0.12<br>(2.57)       |                      | -0.29<br>(1.90)      | 0.27<br>(2.36)       |
| Mobile Penetration    | 0.0070**<br>(0.0028) |                      |                      | 0.0067**<br>(0.0028) |
| Internet Penetration  | -0.0047<br>(0.0082)  |                      |                      | -0.0056<br>(0.0078)  |
| Country FE            | Yes                  | Yes                  | Yes                  | Yes                  |
| Quarter FE            | Yes                  | Yes                  | Yes                  | Yes                  |
| N                     | 3192                 | 3480                 | 3224                 | 3192                 |
| Adj. R2               | 0.78                 | 0.78                 | 0.78                 | 0.78                 |

Standard errors in parentheses

\*  $p < 0.10$ , \*\*  $p < 0.05$ , \*\*\*  $p < 0.01$

Table B.9. Alternate Definitions of Newly-Recruited Contributions

## Panel A: 2 Quarters

|                       | (1)<br>Contributions | (2)<br>Contributions | (3)<br>Contributions | (4)<br>Contributions |
|-----------------------|----------------------|----------------------|----------------------|----------------------|
| Post Google Entry     |                      | -0.56***<br>(0.14)   | -0.54***<br>(0.15)   | -0.50***<br>(0.15)   |
| Population (millions) | 2.55<br>(1.65)       |                      | 2.29<br>(1.75)       | 2.48<br>(1.66)       |
| GDP per capita        | -1.30<br>(2.64)      |                      | -2.37<br>(2.23)      | -1.04<br>(2.56)      |
| Mobile Penetration    | 0.0068**<br>(0.0031) |                      |                      | 0.0062*<br>(0.0031)  |
| Internet Penetration  | -0.012<br>(0.0094)   |                      |                      | -0.012<br>(0.0093)   |
| Country FE            | Yes                  | Yes                  | Yes                  | Yes                  |
| Quarter FE            | Yes                  | Yes                  | Yes                  | Yes                  |
| N                     | 2692                 | 2922                 | 2700                 | 2692                 |
| Adj. R2               | 0.66                 | 0.66                 | 0.66                 | 0.67                 |

Standard errors in parentheses

\*  $p < 0.10$ , \*\*  $p < 0.05$ , \*\*\*  $p < 0.01$ 

## Panel B: 6 Quarters

|                       | (1)<br>Contributions | (2)<br>Contributions | (3)<br>Contributions | (4)<br>Contributions |
|-----------------------|----------------------|----------------------|----------------------|----------------------|
| Post Google Entry     |                      | -0.54***<br>(0.16)   | -0.53***<br>(0.17)   | -0.48***<br>(0.17)   |
| Population (millions) | 2.15<br>(1.57)       |                      | 1.86<br>(1.69)       | 2.08<br>(1.58)       |
| GDP per capita        | 0.19<br>(2.78)       |                      | -1.08<br>(2.33)      | 0.43<br>(2.70)       |
| Mobile Penetration    | 0.0078**<br>(0.0034) |                      |                      | 0.0072**<br>(0.0034) |
| Internet Penetration  | -0.014<br>(0.010)    |                      |                      | -0.013<br>(0.010)    |
| Country FE            | Yes                  | Yes                  | Yes                  | Yes                  |
| Quarter FE            | Yes                  | Yes                  | Yes                  | Yes                  |
| N                     | 2692                 | 2922                 | 2700                 | 2692                 |
| Adj. R2               | 0.69                 | 0.68                 | 0.69                 | 0.69                 |

Standard errors in parentheses

\*  $p < 0.10$ , \*\*  $p < 0.05$ , \*\*\*  $p < 0.01$ 

Note: Contributors are considered “newly recruited” if they made their first contribution in the focal quarter of the quarter before (Panel A) or upto six quarters preceeding the focal quarter (Panel B).

Table B.10. Evaluating Robustness to Alternate Specifications

|                       | Pre-Entry              |                        |                        | Newly-Recruited        |                      |                      |
|-----------------------|------------------------|------------------------|------------------------|------------------------|----------------------|----------------------|
|                       | (1)<br>Poisson         | (2)<br>Diff. Trends    | (3)<br>Placebo         | (4)<br>Poisson         | (5)<br>Diff. Trends  | (6)<br>Placebo       |
| Post Google Entry     | 0.78***<br>(0.037)     | 0.021*<br>(0.012)      | 0.00053<br>(0.0090)    | -0.27***<br>(0.0084)   | -0.54***<br>(0.16)   | -0.091<br>(0.11)     |
| Population (millions) | 4.23***<br>(0.22)      | 0.069<br>(0.073)       | 0.079<br>(0.075)       | 3.66***<br>(0.076)     | 3.16*<br>(1.73)      | 4.24**<br>(1.79)     |
| GDP per capita        | -2.43***<br>(0.70)     | -0.11<br>(0.083)       | -0.12<br>(0.090)       | -6.94***<br>(0.16)     | 0.88<br>(1.17)       | 0.14<br>(2.61)       |
| Mobile Penetration    | 0.0067***<br>(0.00055) | 0.00019<br>(0.00016)   | 0.00020<br>(0.00015)   | 0.0074***<br>(0.00012) | 0.0051**<br>(0.0021) | 0.0070**<br>(0.0028) |
| Internet Penetration  | 0.044***<br>(0.0011)   | -0.000013<br>(0.00032) | -0.000045<br>(0.00031) | -0.017***<br>(0.00031) | 0.0040<br>(0.0060)   | -0.0048<br>(0.0082)  |
| Country FE            | Yes                    | Yes                    | Yes                    | Yes                    | Yes                  | Yes                  |
| Time FE               | Quarter                | Inc. X Quarter         | Quarter                | Quarter                | Inc. X Quarter       | Quarter              |
| Age FE                | No                     | No                     | No                     | No                     | No                   | No                   |
| N                     | 80524                  | 80524                  | 80524                  | 3192                   | 3192                 | 3192                 |
| Adj. R2               |                        | 0.057                  | 0.057                  |                        | 0.79                 | 0.78                 |

Standard errors in parentheses

\*  $p < 0.10$ , \*\*  $p < 0.05$ , \*\*\*  $p < 0.01$ 

*Note:* This table evaluates the robustness of the baseline results to alternate specifications for contributions by pre-entry and newly-recruited contributors in two sets of analyses. In each analysis, the first column estimates a specification similar to the baseline specification, using Poisson rather than Log-OLS models with the dependent variable being  $Contributions_{it}$  and reports standard errors clustered at the country level. The second model estimates the log OLS models using the baseline specification, except these estimates include region-specific time-trends rather than common quarter fixed effects across regions. Specifically, this model includes, IncomeClass X Quarter fixed effects, where countries in the High income category (based on the World Bank Income Classification) have a separate time trend as compared to the rest. Finally, the third model presents results from a placebo exercise where countries are randomly assigned to the five Google Maps entry cohorts, and the *Post Google Entry* variable represents the period after this randomly assigned date.

Table B.11. Impact of Competition of Contributions Removing Outliers  
(a) Pre-Entry Contributors

|                       | (1)<br>Contributions  | (2)<br>Contributions | (3)<br>Contributions | (4)<br>Contributions   |
|-----------------------|-----------------------|----------------------|----------------------|------------------------|
| Post Google Entry     |                       | 0.017*<br>(0.0096)   | 0.016<br>(0.0098)    | 0.018*<br>(0.010)      |
| Population (millions) | 0.031<br>(0.049)      |                      | 0.028<br>(0.051)     | 0.033<br>(0.050)       |
| GDP per capita        | -0.066<br>(0.077)     |                      | -0.077<br>(0.060)    | -0.067<br>(0.077)      |
| Mobile Penetration    | 0.00026*<br>(0.00015) |                      |                      | 0.00028*<br>(0.00014)  |
| Internet Penetration  | -0.00033<br>(0.00021) |                      |                      | -0.00036*<br>(0.00021) |
| Community Member FE   | Yes                   | Yes                  | Yes                  | Yes                    |
| Quarter FE            | Yes                   | Yes                  | Yes                  | Yes                    |
| N                     | 65456                 | 69600                | 65732                | 65456                  |
| Adj. R2               | 0.058                 | 0.058                | 0.058                | 0.058                  |

Standard errors in parentheses

\*  $p < 0.10$ , \*\*  $p < 0.05$ , \*\*\*  $p < 0.01$

(b) Newly Recruited Contributors

|                       | (1)<br>Contributions | (2)<br>Contributions | (3)<br>Contributions | (4)<br>Contributions |
|-----------------------|----------------------|----------------------|----------------------|----------------------|
| Post Google Entry     |                      | -0.63***<br>(0.14)   | -0.61***<br>(0.15)   | -0.56***<br>(0.16)   |
| Population (millions) | 3.84**<br>(1.66)     |                      | 3.64**<br>(1.76)     | 3.78**<br>(1.66)     |
| GDP per capita        | 0.14<br>(2.53)       |                      | -0.26<br>(2.06)      | 0.29<br>(2.51)       |
| Mobile Penetration    | 0.0072**<br>(0.0028) |                      |                      | 0.0067**<br>(0.0028) |
| Internet Penetration  | -0.0055<br>(0.0085)  |                      |                      | -0.0055<br>(0.0084)  |
| Country FE            | Yes                  | Yes                  | Yes                  | Yes                  |
| Quarter FE            | Yes                  | Yes                  | Yes                  | Yes                  |
| N                     | 3076                 | 3360                 | 3108                 | 3076                 |
| Adj. R2               | 0.78                 | 0.78                 | 0.78                 | 0.78                 |

Standard errors in parentheses

\*  $p < 0.10$ , \*\*  $p < 0.05$ , \*\*\*  $p < 0.01$

*Note:* This table replicates the baseline specification. For contributors who contribute to multiple countries, only the country with the highest number of contributions counts.

Table B.12. The Impact of Competition on the number of Pre-Entry Contributors

|                       | (1)<br>Contributors  | (2)<br>Contributors | (3)<br>Contributors | (4)<br>Contributors   |
|-----------------------|----------------------|---------------------|---------------------|-----------------------|
| Post Google Entry     |                      | -0.032<br>(0.053)   | -0.032<br>(0.056)   | -0.027<br>(0.057)     |
| Population (millions) | -0.44<br>(0.39)      |                     | -0.38<br>(0.39)     | -0.45<br>(0.39)       |
| GDP per capita        | -0.11<br>(0.64)      |                     | -0.35<br>(0.55)     | -0.098<br>(0.64)      |
| Mobile Penetration    | 0.00068<br>(0.00086) |                     |                     | 0.00065<br>(0.00086)  |
| Internet Penetration  | -0.0034*<br>(0.0017) |                     |                     | -0.0034**<br>(0.0017) |
| Country FE            | Yes                  | Yes                 | Yes                 | Yes                   |
| Quarter FE            | Yes                  | Yes                 | Yes                 | Yes                   |
| N                     | 3192                 | 3480                | 3224                | 3192                  |
| Adj. R2               | 0.66                 | 0.65                | 0.66                | 0.66                  |

Standard errors in parentheses

\*  $p < 0.10$ , \*\*  $p < 0.05$ , \*\*\*  $p < 0.01$

*Note:* Estimates the impact of competition from Google Maps on the number of pre-entry OpenStreetMap contributors in a differences-in-differences framework. The unit of analysis is country-quarter. The outcome variable is  $Contributor_{it}$  and is measured as the total number of pre-entry contributors in country  $i$  in a given quarter  $t$ .  $Post\ Google\ Entry_{it}=1$  after Google Maps has entered the country  $i$  in a given quarter. The control variables  $X_{it}$  include population, GDP, internet penetration, and mobile penetration, and they vary at the country-year level.  $\gamma_i$  and  $\delta_t$  indicate fixed effects for country and quarter respectively. Clustered standard errors at the country level are reported.

Table B.13. CEM and Time-Varying Trends

|                   | New Recruits Contributions |                  |
|-------------------|----------------------------|------------------|
|                   | (1)                        | (2)              |
| Post Google Entry | -0.42*<br>(0.23)           | -0.42*<br>(0.23) |
| Cntry-Pair FE     | Yes                        | Yes              |
| Time FE           | Quarter                    | Income X Q       |
| Sample            | CEM                        | CEM              |
| N                 | 6400                       | 6380             |
| Adj. R2           | 0.75                       | 0.76             |

Standard errors in parentheses

\*  $p < 0.10$ , \*\*  $p < 0.05$ , \*\*\*  $p < 0.01$

*Note:* This model provides additional robustness checks on the baseline models with a larger sample of countries matched using CEM. Cols 2 and 4 using time-varying income-group times quarter fixed effects while Cols 1 and 3 include quarter fixed effects only

Table B.14. Testing Ideology Using 512 Matched Users

|                      | (1)<br>Github        | (2)<br>Firefox Share | (3)<br>Combined      |
|----------------------|----------------------|----------------------|----------------------|
| Post Google Entry    | 0.0079<br>(0.014)    | 0.0083<br>(0.015)    | 0.014<br>(0.021)     |
| Post X High-Ideology | 0.034***<br>(0.0100) | 0.023*<br>(0.013)    | 0.027***<br>(0.0088) |
| Post X High-Standing |                      |                      | -0.036<br>(0.041)    |
| Post X High-Social   |                      |                      | 0.018<br>(0.014)     |
| <i>N</i>             | 37156                | 37156                | 37156                |
| adj. $R^2$           | 0.055                | 0.054                | 0.055                |

Standard errors in parentheses

\*  $p < 0.10$ , \*\*  $p < 0.05$ , \*\*\*  $p < 0.01$

*Note:* This table presents robustness to the regression examining the mechanisms underlying the positive response of pre-entry contributors. We match 512 “high ideology” pre-entry users with a similar number of control users based on the quarter of Google Maps entry, income and region category and with a similar pattern of contributions prior to Google Maps entry. In the final column, high-ideology is measured based on Github contributions, standing based on rank in terms of contributions and social in terms of whether the community has a mailing list. See text for more details.

Table B.15. Impact of Competition of Contributions Dropping the 5<sup>th</sup> Wave  
(a) Pre-Entry Contributors

|                       | (1)<br>Contributions   | (2)<br>Contributions | (3)<br>Contributions | (4)<br>Contributions   |
|-----------------------|------------------------|----------------------|----------------------|------------------------|
| Post Google Entry     |                        | 0.040***<br>(0.012)  | 0.043***<br>(0.013)  | 0.043***<br>(0.013)    |
| Population (millions) | 0.079<br>(0.076)       |                      | 0.074<br>(0.081)     | 0.085<br>(0.078)       |
| GDP per capita        | -0.097<br>(0.11)       |                      | -0.061<br>(0.099)    | -0.092<br>(0.12)       |
| Mobile Penetration    | 0.00025<br>(0.00016)   |                      |                      | 0.00024<br>(0.00016)   |
| Internet Penetration  | -0.000089<br>(0.00033) |                      |                      | -0.000081<br>(0.00035) |
| Community Member FE   | Yes                    | Yes                  | Yes                  | Yes                    |
| Quarter FE            | Yes                    | Yes                  | Yes                  | Yes                    |
| N                     | 72484                  | 77040                | 72760                | 72484                  |
| Adj. R2               | 0.056                  | 0.056                | 0.056                | 0.056                  |

Standard errors in parentheses

\*  $p < 0.10$ , \*\*  $p < 0.05$ , \*\*\*  $p < 0.01$

(b) Newly Recruited Contributors

|                       | (1)<br>Contributions | (2)<br>Contributions | (3)<br>Contributions | (4)<br>Contributions |
|-----------------------|----------------------|----------------------|----------------------|----------------------|
| Post Google Entry     |                      | -0.57***<br>(0.14)   | -0.49***<br>(0.15)   | -0.48***<br>(0.15)   |
| Population (millions) | 4.64**<br>(1.91)     |                      | 4.34**<br>(1.99)     | 4.59**<br>(1.90)     |
| GDP per capita        | 0.61<br>(2.58)       |                      | -0.11<br>(2.28)      | 0.76<br>(2.61)       |
| Mobile Penetration    | 0.0074**<br>(0.0029) |                      |                      | 0.0074**<br>(0.0029) |
| Internet Penetration  | -0.0072<br>(0.0083)  |                      |                      | -0.0074<br>(0.0083)  |
| Country FE            | Yes                  | Yes                  | Yes                  | Yes                  |
| Quarter FE            | Yes                  | Yes                  | Yes                  | Yes                  |
| N                     | 2912                 | 3200                 | 2944                 | 2912                 |
| Adj. R2               | 0.78                 | 0.77                 | 0.78                 | 0.78                 |

Standard errors in parentheses

\*  $p < 0.10$ , \*\*  $p < 0.05$ , \*\*\*  $p < 0.01$

*Note:* This table replicates the baseline specification with only the first 4 waves of treatment.

Table B.16. Country-level Heterogeneous Impact of Competition on Contributions

## (a) Pre-Entry Contributors

|                       | (1)<br>Population      | (2)<br>GDP PC         | (3)<br>Mobile          | (4)<br>Internet       |
|-----------------------|------------------------|-----------------------|------------------------|-----------------------|
| Post Google Entry     | 0.019<br>(0.013)       | 0.012<br>(0.011)      | 0.019*<br>(0.011)      | 0.010<br>(0.010)      |
| Post × High           | 0.0014<br>(0.0096)     | 0.012<br>(0.0096)     | 0.0017<br>(0.011)      | 0.016<br>(0.0098)     |
| Population (millions) | 0.078<br>(0.075)       | 0.094<br>(0.072)      | 0.086<br>(0.088)       | 0.095<br>(0.071)      |
| GDP per capita        | -0.12<br>(0.092)       | -0.15<br>(0.10)       | -0.12<br>(0.094)       | -0.13<br>(0.097)      |
| Mobile Penetration    | 0.00023<br>(0.00015)   | 0.00026<br>(0.00016)  | 0.00023<br>(0.00015)   | 0.00028*<br>(0.00016) |
| Internet Penetration  | -0.000055<br>(0.00032) | -0.00025<br>(0.00030) | -0.000078<br>(0.00030) | -0.00039<br>(0.00032) |
| Country FE            | Yes                    | Yes                   | Yes                    | Yes                   |
| Quarter FE            | Yes                    | Yes                   | Yes                    | Yes                   |
| N                     | 80524                  | 80524                 | 80524                  | 80524                 |
| Adj. R2               | 0.056                  | 0.056                 | 0.056                  | 0.056                 |

Standard errors in parentheses

\*  $p < 0.1$ , \*\*  $p < 0.05$ , \*\*\*  $p < 0.01$ 

## (b) Newly Recruited Contributors

|                       | (1)<br>Population     | (2)<br>GDP PC         | (3)<br>Mobile        | (4)<br>Internet       |
|-----------------------|-----------------------|-----------------------|----------------------|-----------------------|
| Post Google Entry     | -0.85***<br>(0.20)    | -0.36*<br>(0.21)      | -0.48**<br>(0.21)    | -0.64***<br>(0.20)    |
| Post × High           | 0.63***<br>(0.16)     | -0.26<br>(0.19)       | -0.052<br>(0.20)     | 0.22<br>(0.19)        |
| Population (millions) | -0.029<br>(1.03)      | 2.26<br>(1.58)        | 2.74*<br>(1.62)      | 3.06*<br>(1.65)       |
| GDP per capita        | 2.94<br>(1.99)        | 3.26<br>(2.36)        | 2.91<br>(2.39)       | 2.81<br>(2.37)        |
| Mobile Penetration    | 0.0082***<br>(0.0028) | 0.0080***<br>(0.0030) | 0.0083**<br>(0.0032) | 0.0086***<br>(0.0030) |
| Internet Penetration  | -0.0024<br>(0.0078)   | 0.0018<br>(0.0085)    | -0.0023<br>(0.0086)  | -0.0084<br>(0.0096)   |
| Country FE            | Yes                   | Yes                   | Yes                  | Yes                   |
| Quarter FE            | Yes                   | Yes                   | Yes                  | Yes                   |
| N                     | 3192                  | 3192                  | 3192                 | 3192                  |
| Adj. R2               | 0.84                  | 0.84                  | 0.84                 | 0.84                  |

Standard errors in parentheses

\*  $p < 0.1$ , \*\*  $p < 0.05$ , \*\*\*  $p < 0.01$ 

Note: This table replicates the baseline specification and interacts the Post dummy with indicators of country-level heterogeneity.

Column (1) interacts with an indicator of high population, column (2) interacts with an indicator of high GDP per capita, column

(3) interacts with an indicator of high mobile penetration, and column (4) interacts with an indicator of high internet penetration.

Table B.17. Impact of Competition on Contributions Dropping Multi-country Contributors  
(a) Pre-Entry Contributors

|                       | (1)<br>Contributions    | (2)<br>Contributions | (3)<br>Contributions | (4)<br>Contributions    |
|-----------------------|-------------------------|----------------------|----------------------|-------------------------|
| Post Google Entry     |                         | 0.045**<br>(0.019)   | 0.044**<br>(0.019)   | 0.046**<br>(0.019)      |
| Population (millions) | 0.14<br>(0.14)          |                      | 0.13<br>(0.14)       | 0.15<br>(0.15)          |
| GDP per capita        | -0.14<br>(0.17)         |                      | -0.31<br>(0.21)      | -0.15<br>(0.18)         |
| Mobile Penetration    | 0.00056**<br>(0.00023)  |                      |                      | 0.00060***<br>(0.00021) |
| Internet Penetration  | -0.0014***<br>(0.00050) |                      |                      | -0.0014***<br>(0.00051) |
| Community Member FE   | Yes                     | Yes                  | Yes                  | Yes                     |
| Quarter FE            | Yes                     | Yes                  | Yes                  | Yes                     |
| N                     | 108852                  | 114720               | 109344               | 108852                  |
| Adj. R2               | 0.013                   | 0.012                | 0.013                | 0.013                   |

Standard errors in parentheses

\*  $p < 0.10$ , \*\*  $p < 0.05$ , \*\*\*  $p < 0.01$

(b) Newly Recruited Contributors

|                       | (1)<br>Contributions | (2)<br>Contributions | (3)<br>Contributions | (4)<br>Contributions |
|-----------------------|----------------------|----------------------|----------------------|----------------------|
| Post Google Entry     |                      | -1.14***<br>(0.18)   | -1.10***<br>(0.19)   | -1.04***<br>(0.20)   |
| Population (millions) | 7.53***<br>(2.80)    |                      | 7.02**<br>(2.72)     | 7.41***<br>(2.79)    |
| GDP per capita        | 0.95<br>(3.77)       |                      | 1.73<br>(3.05)       | 1.25<br>(3.75)       |
| Mobile Penetration    | 0.0091**<br>(0.0042) |                      |                      | 0.0082*<br>(0.0042)  |
| Internet Penetration  | 0.0047<br>(0.011)    |                      |                      | 0.0046<br>(0.011)    |
| Country FE            | Yes                  | Yes                  | Yes                  | Yes                  |
| Quarter FE            | Yes                  | Yes                  | Yes                  | Yes                  |
| N                     | 3192                 | 3480                 | 3224                 | 3192                 |
| Adj. R2               | 0.63                 | 0.61                 | 0.63                 | 0.63                 |

Standard errors in parentheses

\*  $p < 0.10$ , \*\*  $p < 0.05$ , \*\*\*  $p < 0.01$

*Note:* This table replicates the baseline specification. For contributors who contribute to multiple countries, only the country with the highest number of contributions counts.
